# Supplementary material
Source: PubMed Central journal article supplement (PMC3270966)

# The catalytic mechanism of rhomboid protease GlpG probed by 3,4-dichloroisocoumarin and diisopropyl fluorophosphate

Yi Xue<sup>‡</sup> and Ya Ha<sup>‡,1</sup>

From the <sup>‡</sup>Department of Pharmacology, Yale School of Medicine, New Haven, Connecticut 06520

<sup>1</sup>To whom correspondence should be addressed: Department of Pharmacology, Yale School of Medicine, 333 Cedar Street, New Haven, Connecticut 06520. Tel.: 203-785-7530; Fax: 203-785-7670; E-mail: ya.ha@yale.edu.

## Supplemental Material

### Supplemental figure legends

**Fig. S1. Identification of the hydrolytic products of DCI by LC-MS.** **A-C**, The positive-ion mass spectra for the intact inhibitor **1**, acid chloride **2** and carboxylic acid **3**. The molecular species (M), plus either proton or sodium ion(s), are shown in the brackets. The theoretical molecular mass for each compound is listed below the spectra. **D**, Under alkaline conditions (100mM NaOH), DCI is quickly hydrolyzed to yield a single HPLC peak, which has similar elution volume and appearance as the peak (**4**) produced by GlpG (Fig. 1A). In this experiment, 20 times more inhibitor was used to enhance the signal of mass spectrometry. **E** and **F**, The positive-ion and negative-ion mass spectra for the peak generated by alkaline treatment. Unlike **1**, **2** and **3**, only fragments of the compound are observable in the positive-ion spectrum. In the negative-ion spectrum, a clear (but not the strongest) peak at 195.1 is observed, which corresponds to the mass of the  $\alpha$ -hydroxy acid (minus a proton; Fig. 1B). All other major peaks in the positive-ion and negative-ion spectra can be explained by the  $\alpha$ -hydroxy acid, as they correspond in mass to fragments of the compound that have first lost a H<sub>2</sub>O, and then a CO<sub>2</sub>. This fragmentation pattern is characteristic for *cis*-oriented di-carboxylic acids (38). **G** and **H**, The positive-ion and negative-ion mass spectra for the peak (**4**) generated by GlpG. Although the negative-ion peak at 195.1 is not observed, probably due to lower sample amount, all other major peaks match well with those in **E** and **F**, thus confirming that **4** corresponds to the same  $\alpha$ -hydroxy acid. Note that the  $\alpha$ -hydroxy acid (**4**) has a much lower extinction coefficient than the intact DCI.

**Fig. S2. A hypothetical mechanism for GlpG-catalyzed DCI hydrolysis.** The catalytic Ser-201 attacks the carbonyl carbon (C1) of the inhibitor **1**, generating an unstable acid chloride, which spontaneously hydrolyzes to form free carboxylic acid. His-254 then functions as a base to activate a water to attack C4, resulting in the replacement of the chlorine with a hydroxyl group. The unstable acylenzyme quickly undergoes hydrolysis to release  $\alpha$ -hydroxy acid **4**. In this mechanism, the enzyme provides a base (His-254) to facilitate the dechlorination on C4, which mimics the action of NaOH in solution.

**Fig. S3. Difference Fourier analysis confirms the binding of DFP to the membrane protease.** The apo structure (2ic8) was used to generate the phases for map calculation. The F<sub>o</sub>-F<sub>c</sub> map is contoured at +3 $\sigma$  (blue) and -3 $\sigma$  (red) levels. The concerted side chain movements are indicated by arrows.

**Figure S1**

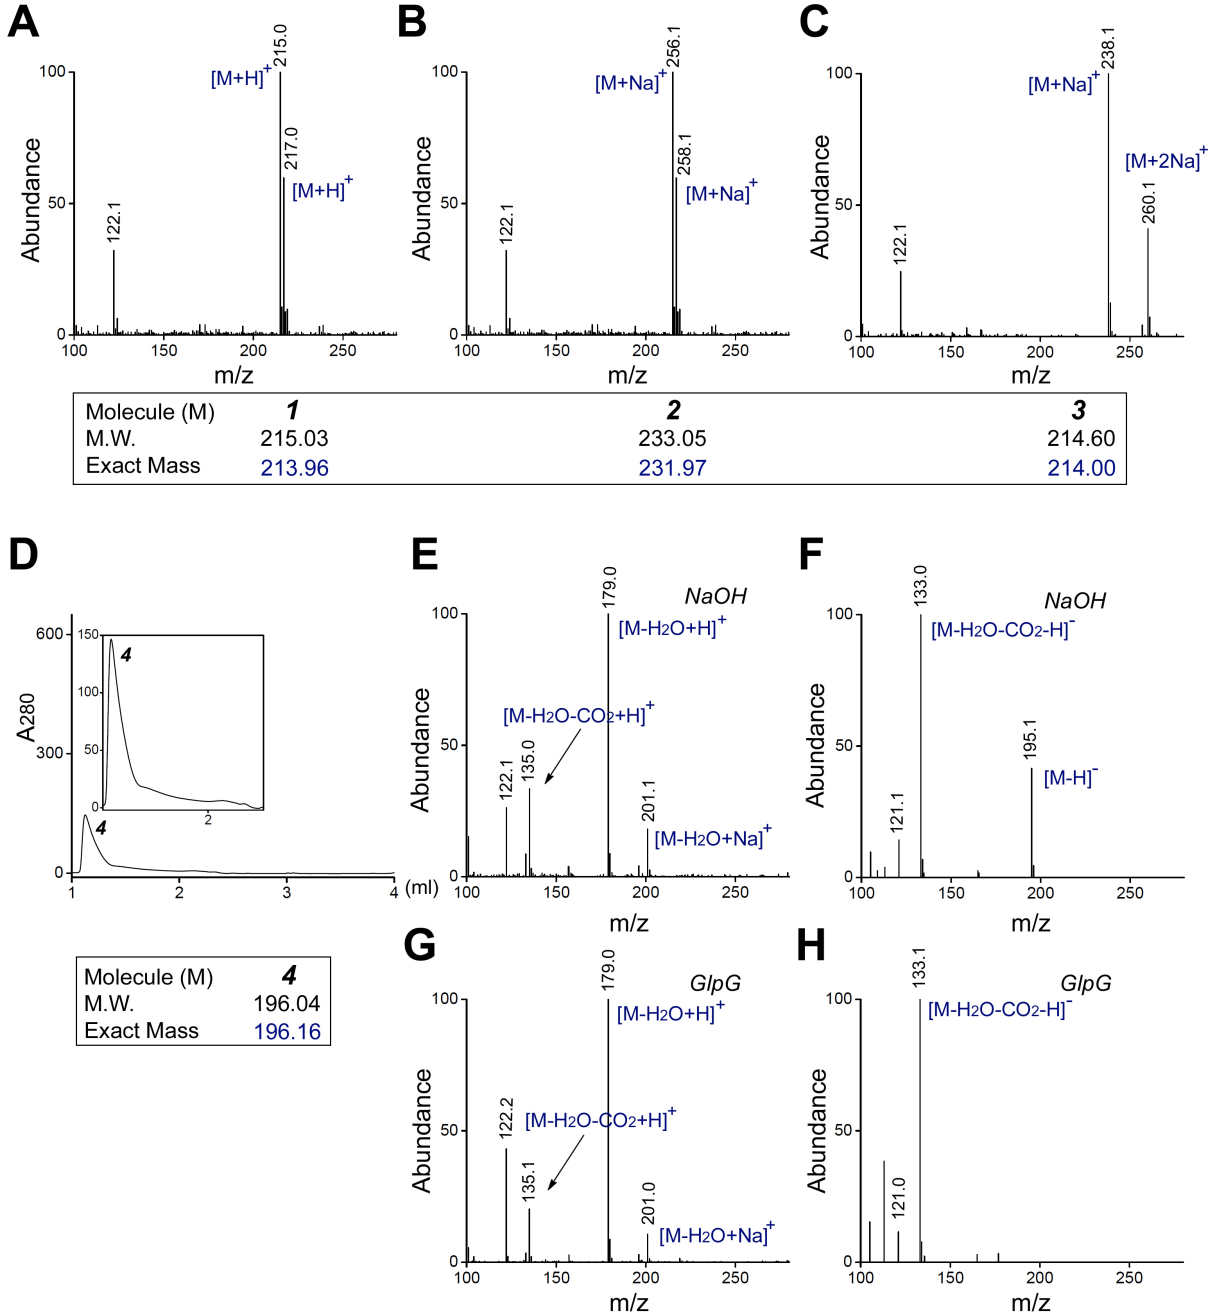

Figure S2

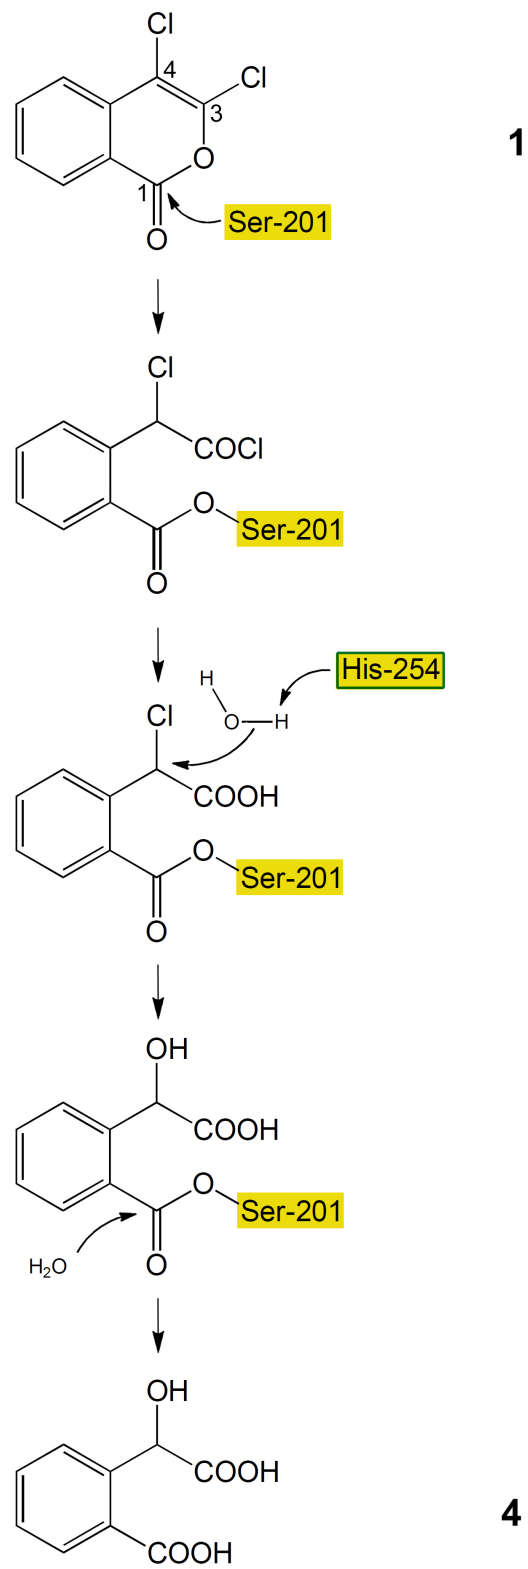

**Figure S3**

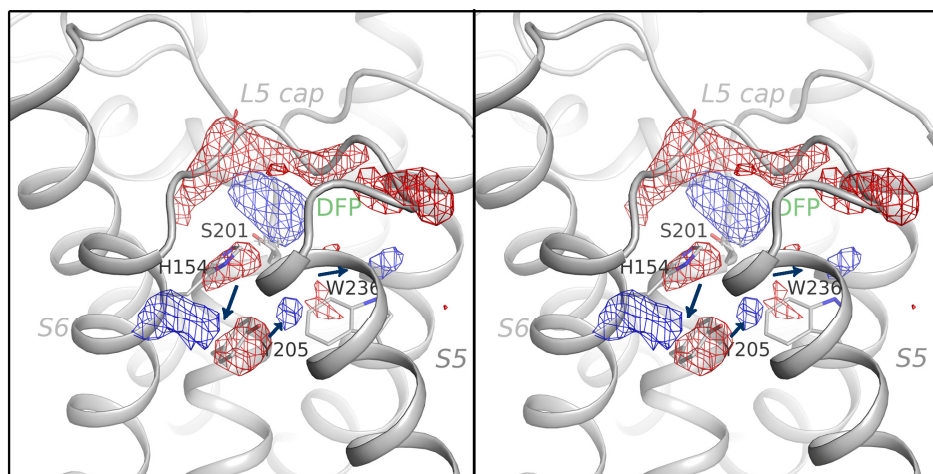

Supplement: supp_M111.310482_dfp-Supplemental_figure_legends-rev.pdf [file supp_M111.310482_dfp-Supplemental_figure_legends-rev.pdf]
